# Supplementary material for: Suppression of colonic oxidative stress caused by chronic ethanol administration and attenuation of ethanol-induced colitis and gut leakiness by oral administration of sesaminol in mice
Source: Royal Society of Chemistry journal article supplement (doi:10.1039/d1fo04120g), 2022-01-01
Supplement: d1fo04120g1.pdf [file d1fo04120g1.pdf]

### Supplementary Table 1.

<sup>a</sup> Detailed nutritional compositions and ingredients of animal diets

#### A. Nutritional composition [Calory (%)]

| Composition      | Diet   |       |                                    |
|------------------|--------|-------|------------------------------------|
|                  | AIN93M | LDCLD | LDCLD containing 2.0 % v/v ethanol |
| Protein (%)      | 15     | 17    | 17                                 |
| Carbohydrate (%) | 76     | 47    | 33                                 |
| Fat (%)          | 9      | 36    | 36                                 |
| Ethanol (%)      |        | 0     | 14                                 |
| Total            | 100    | 100   | 100                                |

#### B. Ingredient details

| Ingredient         | Diet   |         |       |         |                                    |         |
|--------------------|--------|---------|-------|---------|------------------------------------|---------|
|                    | AIN93M |         | LDCLD |         | LDCLD containing 2.0 % v/v ethanol |         |
|                    | g/kg   | kcal/kg | g/kg  | kcal/kg | g/kg                               | kcal/kg |
| Casein             | 140    | 560     | 41.4  | 166     | 41.4                               | 166     |
| DL-Methionine      | 0      | 0       | 0.3   | 1       | 0.3                                | 1       |
| L-Cystine          | 1.8    | 7       | 0.5   | 2       | 0.5                                | 2       |
| Corn Starch        | 496    | 1980    | 0     | 0       | 0                                  | 0       |
| Maltodextrin       | 125    | 500     | 115   | 461     | 80                                 | 320     |
| Sucrose            | 100    | 400     | 0     | 0       | 0                                  | 0       |
| Cellulose          | 50     | 0       | 10    | 0       | 10                                 | 0       |
| Xanthan Gum        | 0      | 0       | 3     | 0       | 3                                  | 0       |
| Soybean Oil        | 40     | 360     | 0     | 0       | 0                                  | 0       |
| Corn Oil           | 0      | 0       | 8.5   | 77      | 8.5                                | 77      |
| Olive Oil          | 0      | 0       | 28.4  | 256     | 28.4                               | 256     |
| Safflower Oil      | 0      | 0       | 2.7   | 24      | 2.7                                | 24      |
| Minerals - Mix     | 35     | 0       | 8.8   | 0       | 8.8                                | 0       |
| Vitamins - Mix     | 10     | 40      | 2.5   | 9       | 2.5                                | 9       |
| Choline Bitartrate | 2.5    | 0       | 0.5   | 0       | 0.5                                | 0       |
| Ethanol 100%       | 0      | 0       | 0     | 0       | 20                                 | 140     |
| H <sub>2</sub> O   | 0      | 0       | 778   | 0       | 793                                | 0       |
| Total              | 1000   | 3850    | 1000  | 996     | 1000                               | 995     |

<sup>a</sup> For acclimation of the mice used (n = 32), AIN93M was used during the first one week and LDCLD during the next one week. During intervention, LDCLD was used for Groups C and S (n = 8 each) and LDCLD containing 2% v/v ethanol was used for Groups E and ES (n = 8 each).

**Supplementary Table 2.** Primer sequences

| Gene (mouse)   | Forward 5'→3'               | Reverse 5'→3'          | GeneBank accession number |
|----------------|-----------------------------|------------------------|---------------------------|
| TNF- $\alpha$  | ACACTCAGATCATCTTCTCAAAATTCG | GTGTGGGTGAGGAGCACGTAGT | X02611                    |
| MCP-1          | ATGCAGGTCCTGTCATGCTTC       | GGCATCACAGTCCGAGTCACAC | BC145869                  |
| IL-6           | AACGATGATGCACTTGCAGA        | GAGCATTGGAAATTGGGGTA   | X54542                    |
| $\beta$ -Actin | CTAAGGCCAACCGTGAAAAG        | ACCAGAGGCATACAGGGACA   | NM_007393.3               |

TNF- $\alpha$ , Tumor necrosis factor- $\alpha$ ; MCP-1, Monocyte chemoattractant protein-1; IL-6, Interleukin-6

**Supplementary Table 3.**

Plasma and faecal sesaminol contents of the mice on

| Group<br>(N=3/group) | Sesaminol content                     |                                    |
|----------------------|---------------------------------------|------------------------------------|
|                      | Plasma<br>( $\mu\text{g/mL-Plasma}$ ) | Feces<br>( $\mu\text{g/g-feces}$ ) |
|                      | *                                     | *                                  |
| Group C              | *                                     | *                                  |
|                      | *                                     | *                                  |
| Group S              | *                                     | 49                                 |
|                      | *                                     | *                                  |
|                      | *                                     | *                                  |
| Group E              | *                                     | *                                  |
|                      | *                                     | *                                  |
| Group ES             | *                                     | 4.33                               |
|                      | *                                     | 1.69                               |
|                      | *                                     | 1.98                               |

\* Below detection limit.

**Supplementary Fig. 1** Microscopic observation of HE-stained and Oil red-O stained liver tissues in mice

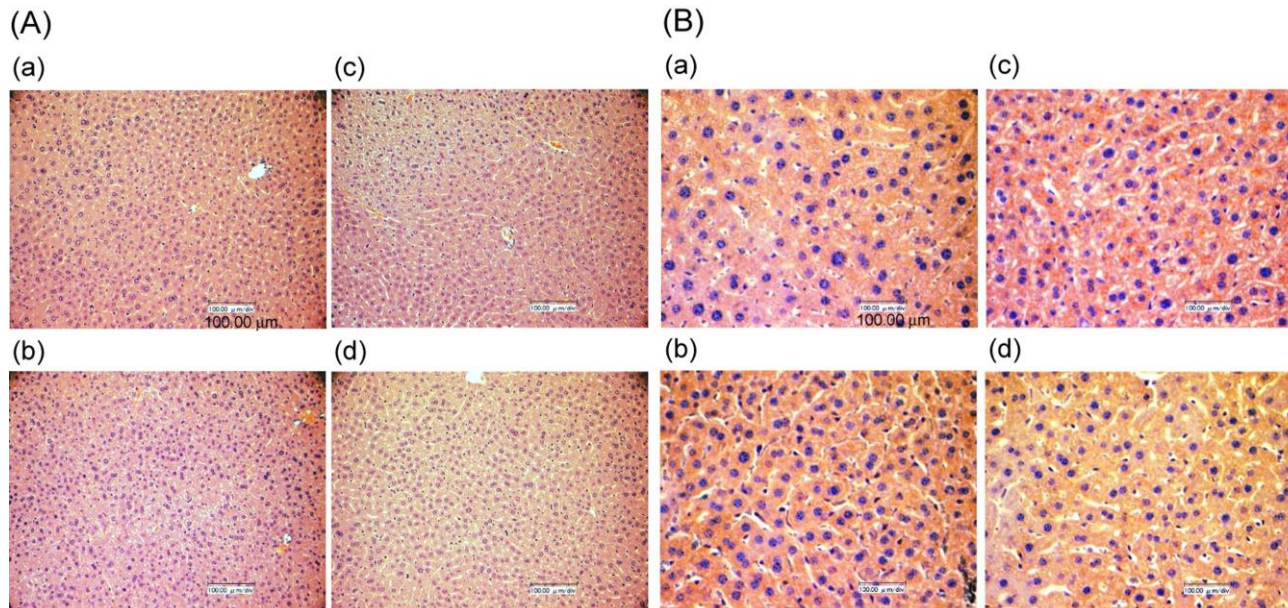

(A) HE staining of liver section images at 400X magnification, (B) Oil-red O staining of liver sections images at 1,000X magnification shows hepatic triglyceride levels. (a) Group C, (b) Group S, (c) Group E, and (d) Group ES.

**Supplementary Fig. 2. Effects of sesaminol on ethanol-induced elevation of 8-OHdG in hepatic cells**

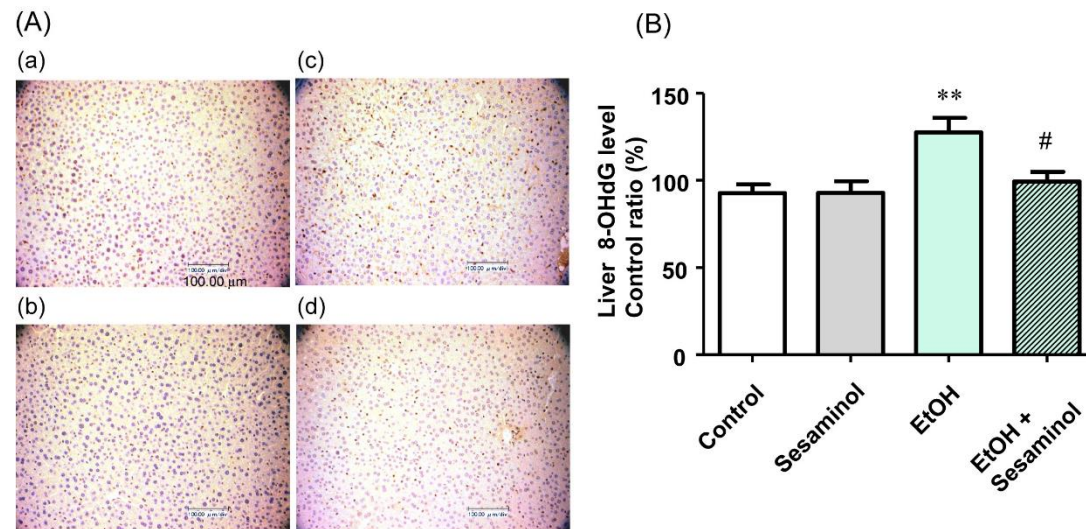

(A) Images of the 8-OHdG immunohistochemical staining of liver section at 400X magnification, (a) Group C, (b) Group S, (c) Group E, and (d) Group ES.

(B) The levels of 8-OHdG in the mtDNA of liver cells were determined by ELISA, and the relative percentages of the 8-OHdG levels are shown with the level obtained with a subject of Group C taken to be 100%. The data are expressed as means  $\pm$ SD (n = 5).

\* $p < 0.05$  versus Group C, † $p < 0.05$  versus Group S, # $p < 0.05$  versus Group E as assessed by ANOVA with the Tukey-Kramer test.
